# Supplementary material for: Triplex DNA-binding proteins are associated with clinical outcomes revealed by proteomic measurements in patients with colorectal cancer
Source: PubMed Central journal article supplement (PMC3537547; doi:10.1186/1476-4598-11-38), 2012-06-08

Supplementary Figure 1.

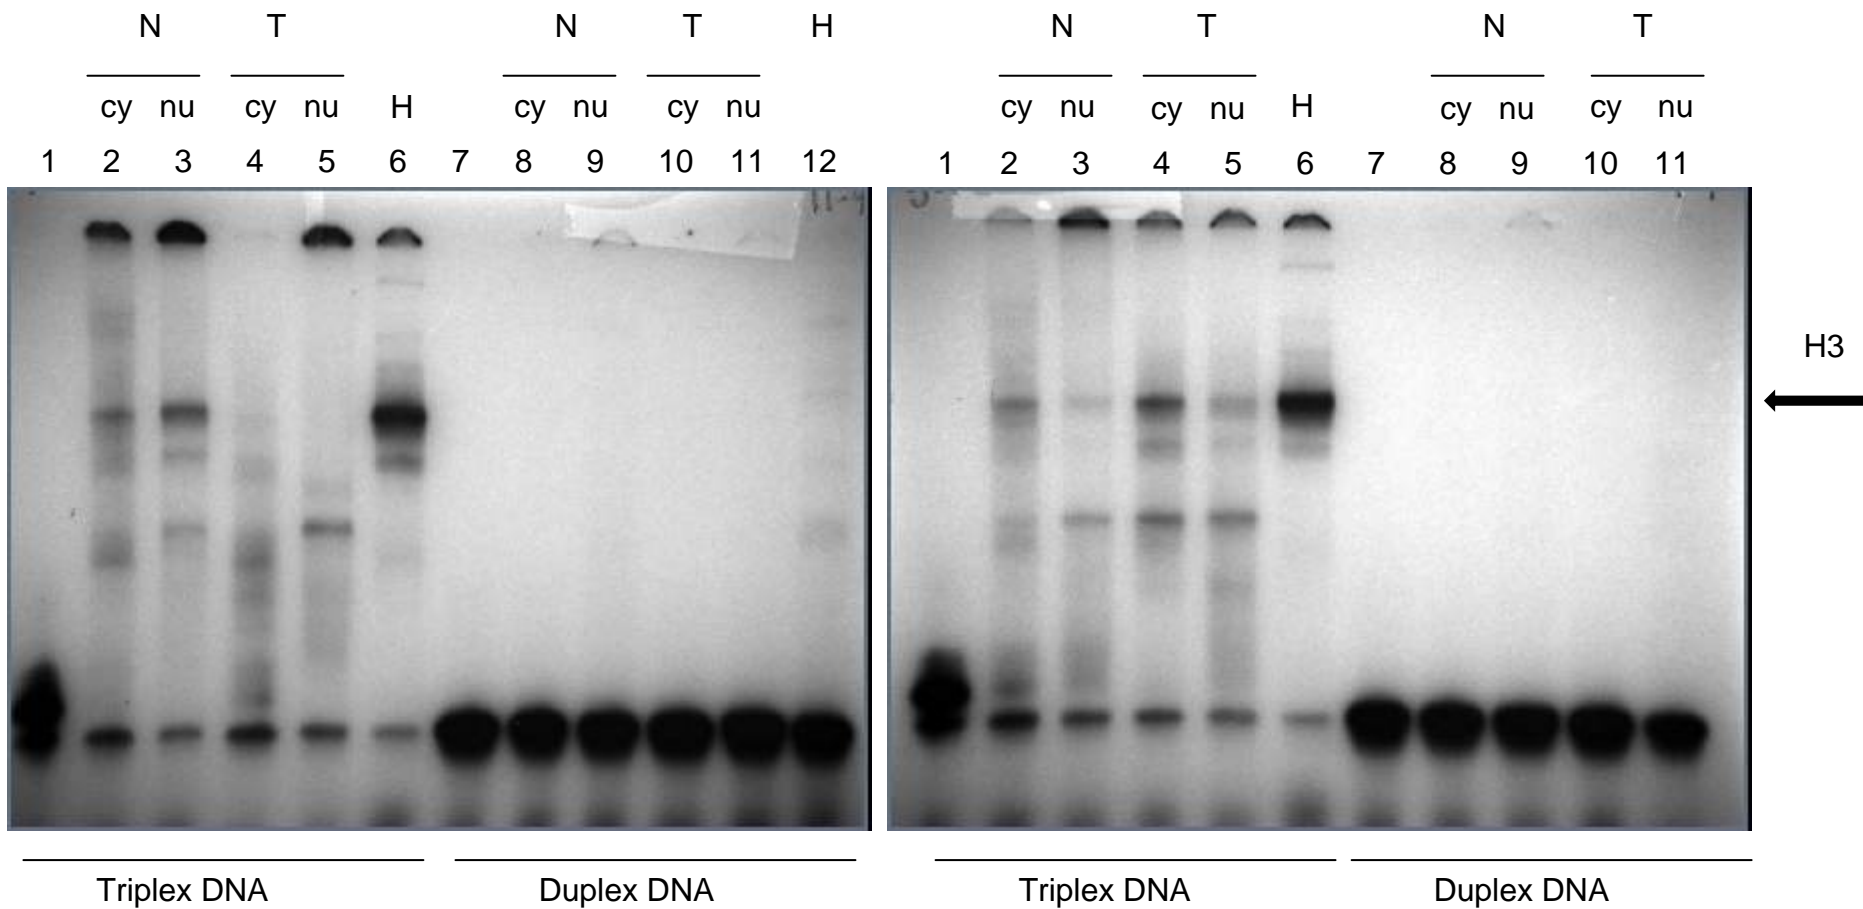

Supplementary Figure 2a

|   | GEO  |     | RKO  |     | HT29 |     | Colo320 |     | HeLa |     |
|---|------|-----|------|-----|------|-----|---------|-----|------|-----|
|   | cyto | nuc | cyto | nuc | cyto | nuc | cyto    | nuc | cyto | nuc |
| 1 | 2    | 3   | 4    | 5   | 6    | 7   | 8       | 9   | 10   | 11  |

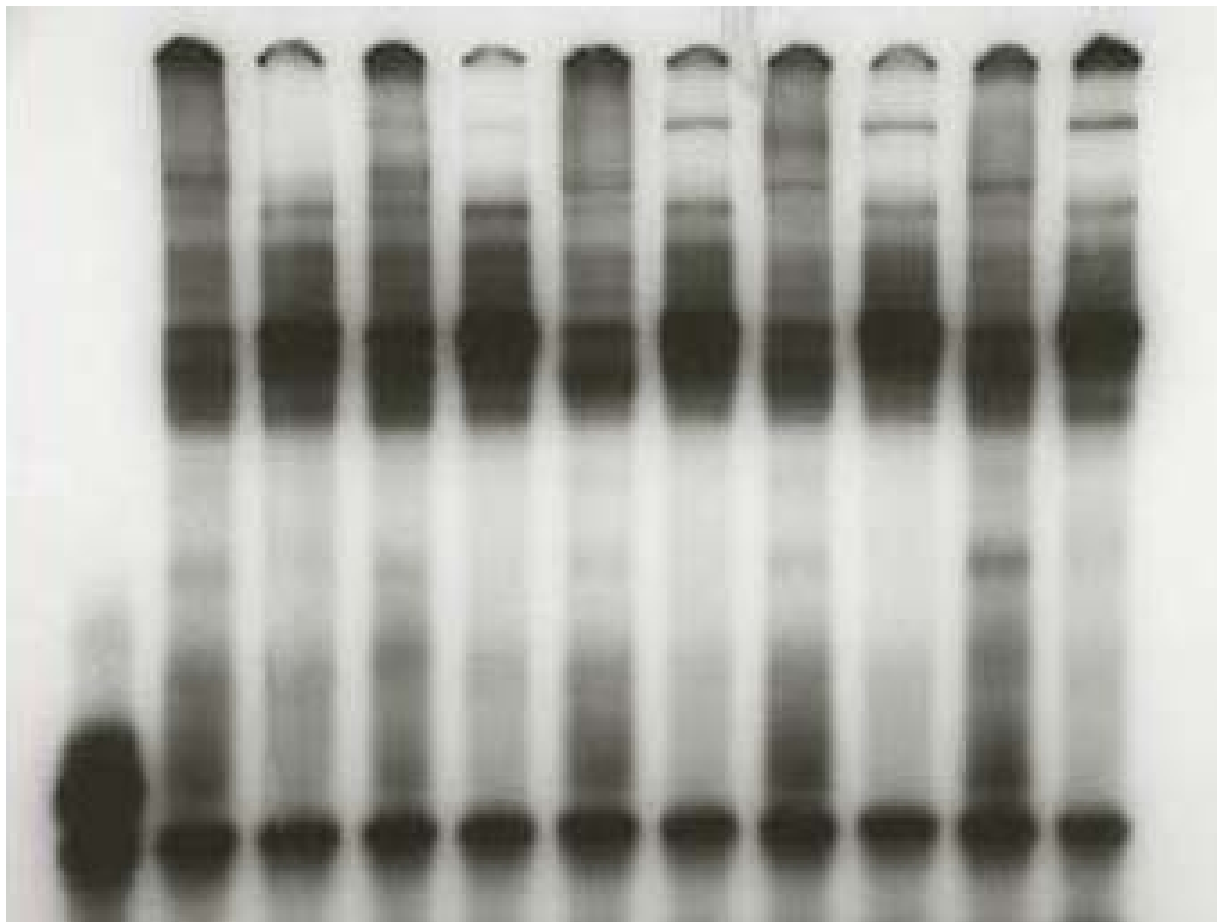

Supplementary Figure 2a continued

|   | HCT116 |     | SW480 |     | Colo206F |     | wiDR |     | HeLa |     |
|---|--------|-----|-------|-----|----------|-----|------|-----|------|-----|
|   | cyto   | nuc | cyto  | nuc | cyto     | nuc | cyto | nuc | cyto | nuc |
| 1 | 2      | 3   | 4     | 5   | 6        | 7   | 8    | 9   | 10   | 11  |

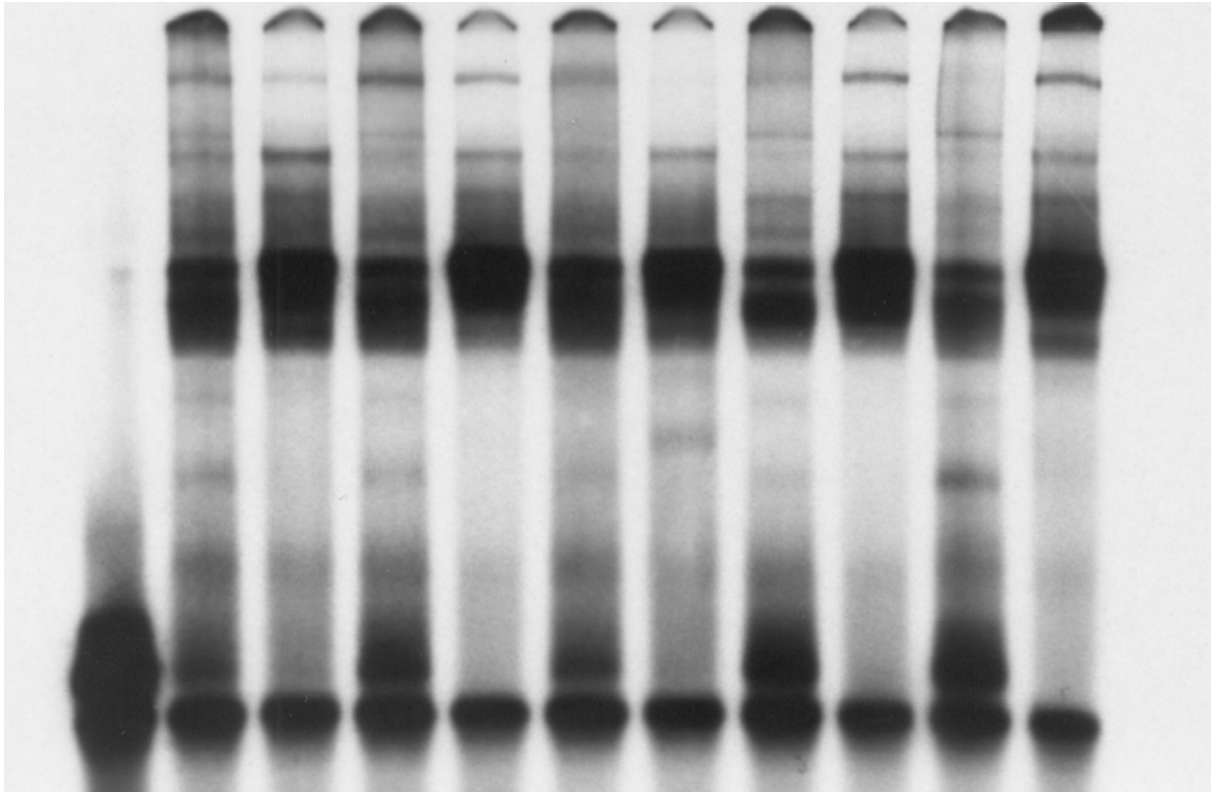

Supplementary Figure 2b

| GEO |     | RKO |     | HT-29 |     | Colo320 |     |
|-----|-----|-----|-----|-------|-----|---------|-----|
| cy  | nuc | cy  | nuc | cy    | nuc | cy      | nuc |

| HCT116 |     | SW480 |     | Colo206F |     | wiDR |     |
|--------|-----|-------|-----|----------|-----|------|-----|
| cy     | nuc | cy    | nuc | cy       | nuc | cy   | nuc |

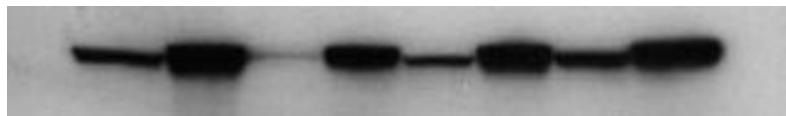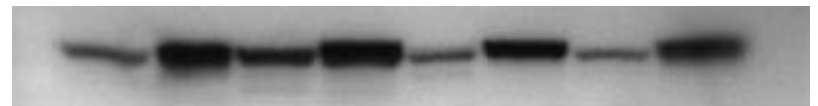

PSF

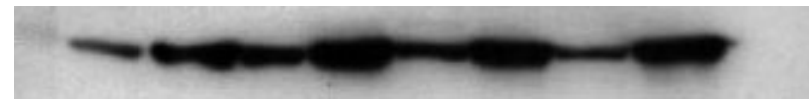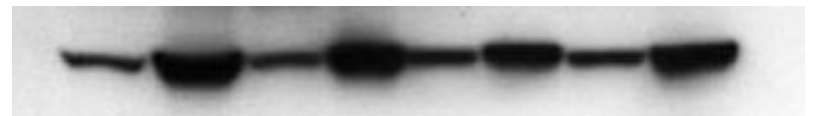

U2AF65

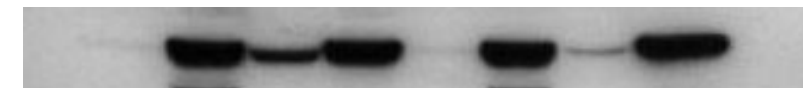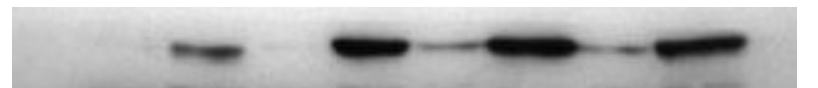

p54nrb

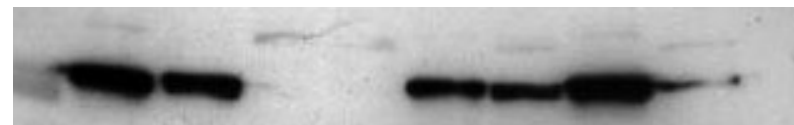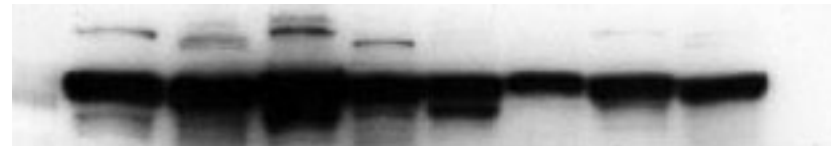

β-catenin

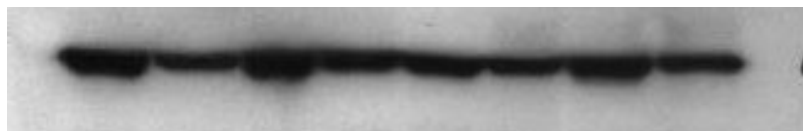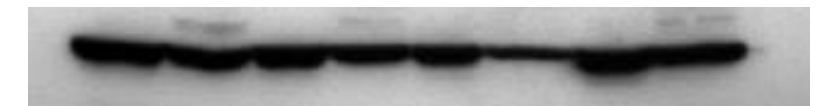

actin



Supplementary Figure 4

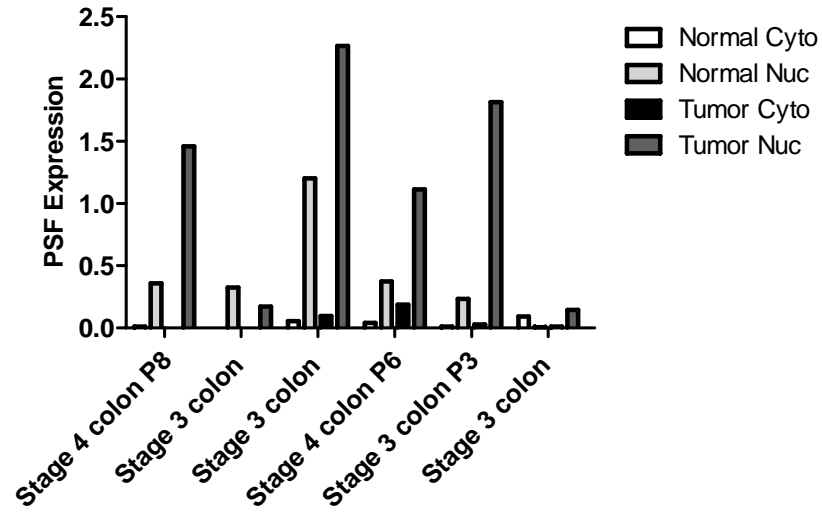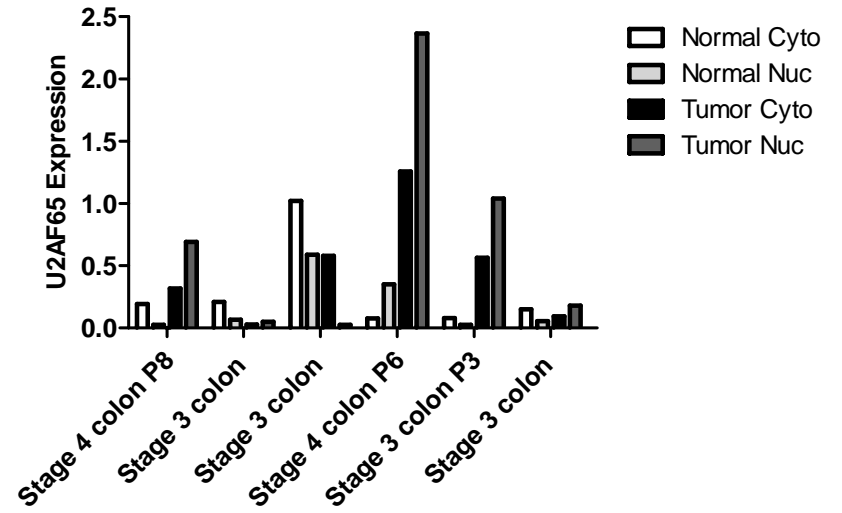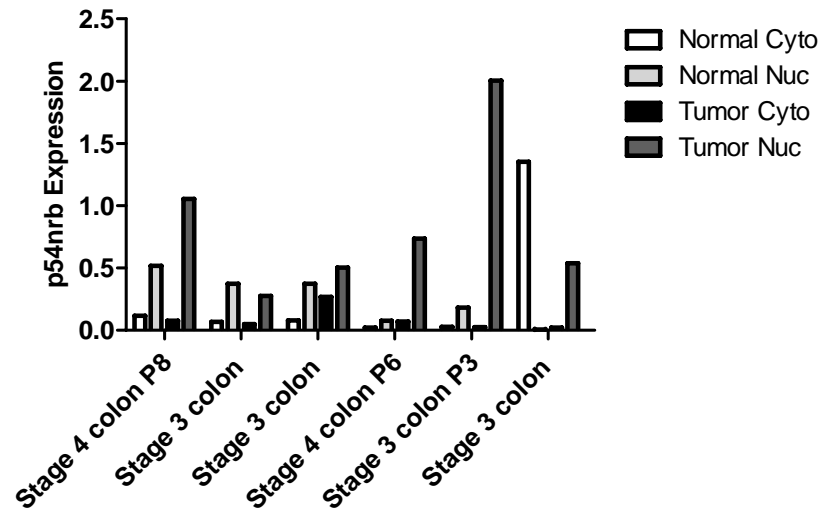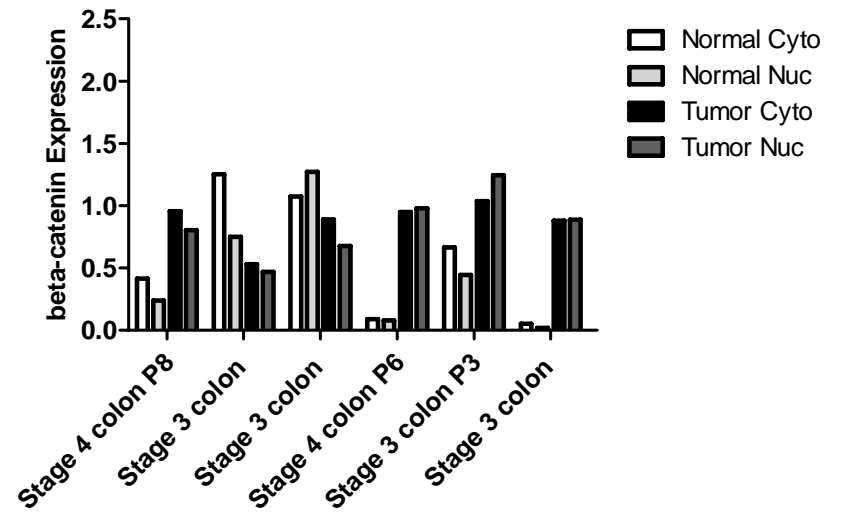

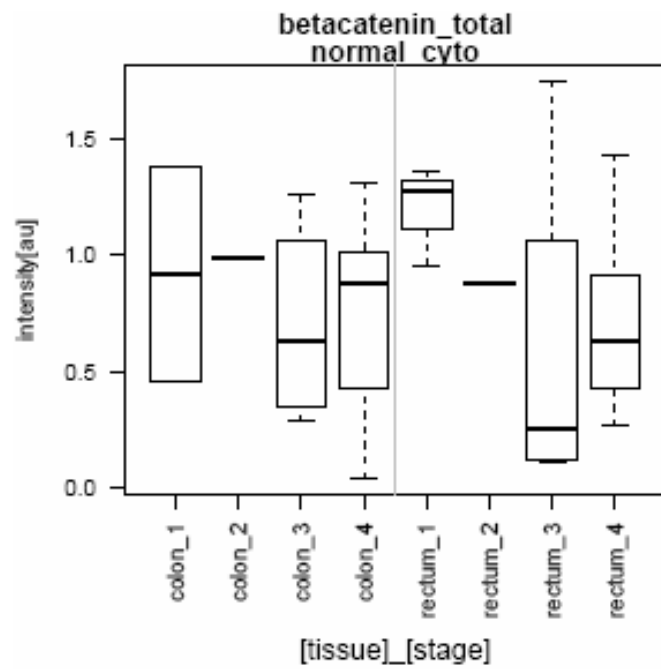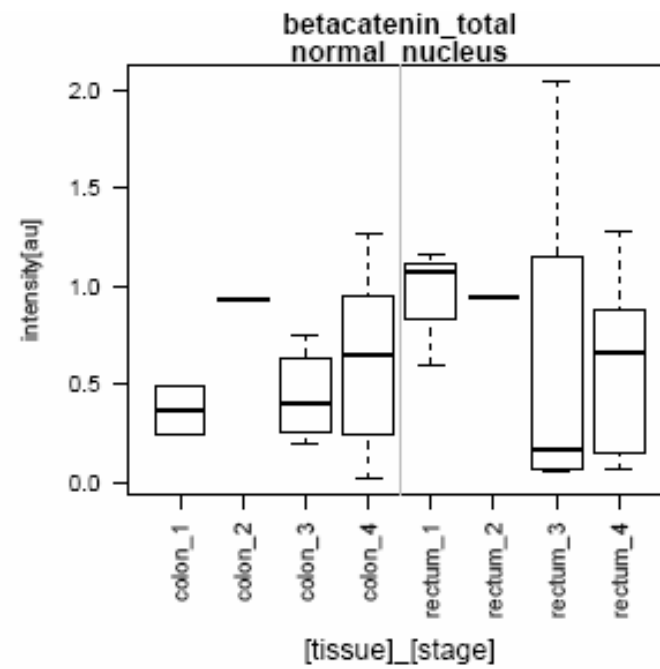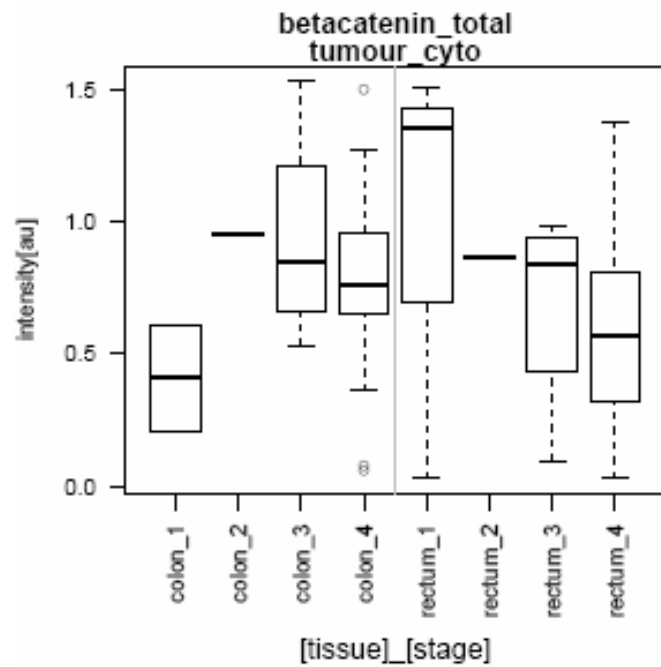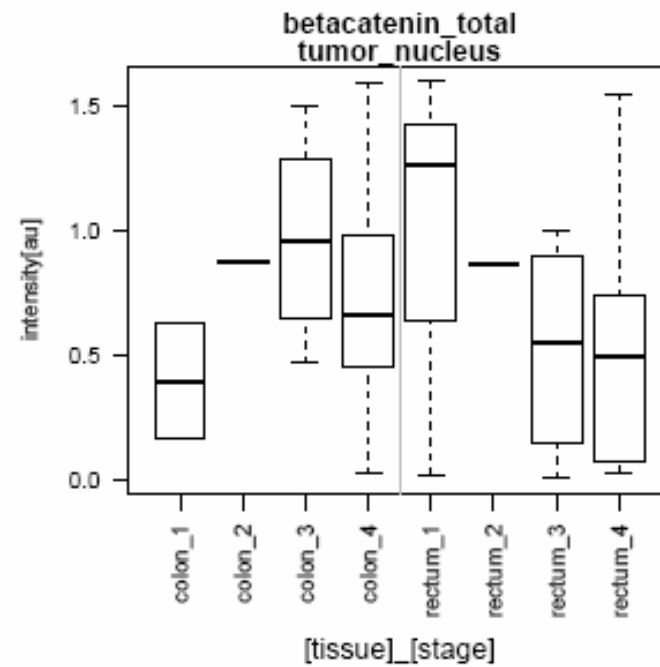

Supplement: 1476-4598-11-38-S1.pdf [file 1476-4598-11-38-S1.pdf]
