# Supplementary material for: Triplex DNA-binding proteins are associated with clinical outcomes revealed by proteomic measurements in patients with colorectal cancer
Source: Mol Cancer. 2012 Jun 8;11:38. doi: 10.1186/1476-4598-11-38 (PMC3537547; doi:10.1186/1476-4598-11-38)
Supplement: Additional file 4 — DBuergy Correlations(1). [file 1476-4598-11-38-S4.xls]

## Sheet: Sheet
Correlations
			U2AF65NormalCytoplasm	U2AF65NormalNucleus	U2AF65NormalTotal	U2AF65TumorCytoplasm	U2AF65TumorNucleus	U2AF65TumorTotal	PSFNormalCytoplasm	PSFNormalNucleus	PSFNormalTotal	PSFTumorCytoplasm	PSFTumorNucleus	PSFTumorTotal	p54nrbNormalCytoplasm	p54nrbNormalNucleus	p54nrbNormalTotal	p54nrbTumorCytoplasm	p54nrbTumorNucleus	p54nrbTumorTotal	UICC	pT	pN	M	G	EMSAcytoplasmNormalTissue	EMSAnucleusNormalTissue	EMSAtotalNormalTissue	EMSAcytoplasmTumor	EMSAnucleusTumor	EMSAtotalTumor	EMSAratioTumorNormalInCytoplasm	EMSAratioTumorNormalInNucleus	EMSAratioTumorNormalTotal
Spearman's rho	U2AF65NormalCytoplasm	Correlation Coefficient	1	0.626996	0.919108	0.164252	-0.0860367	0.120236	0.243314	0.121745	0.15857	0.0757048	-0.147867	-0.0580552	0.461277	0.456471	0.485339	0.266425	-0.0736096	-0.0823529	0.00805975	0.0202829	0.0687249	0.0378299	-0.111812	0.390115	0.301086	0.356863	0.0771013	0.0610284	0.0938553	-0.239176	-0.151024	-0.213317
		Sig. (2-tailed)	.	1e-06	1e-06	0.222118	0.536185	0.372989	0.0853425	0.389911	0.252108	0.597502	0.285949	0.679666	0.000657284	0.000760533	0.000306376	0.0587843	0.59682	0.565619	0.952552	0.880958	0.611476	0.779952	0.434709	0.00270071	0.0228533	0.00643175	0.56864	0.652013	0.487413	0.0731593	0.262121	0.11111
		N	57	52	57	57	54	57	51	52	54	51	54	53	51	51	51	51	54	51	57	57	57	57	51	57	57	57	57	57	57	57	57	57
	U2AF65NormalNucleus	Correlation Coefficient	0.626996	1	0.845983	0.277396	-0.0514074	0.217707	0.399837	0.250491	0.263895	0.239468	-0.108969	-0.00563476	0.371411	0.479276	0.43267	0.260271	-0.0396416	0.0100452	0.00691416	0.047199	-0.0130303	0.16158	-0.194603	0.156969	0.334849	0.246105	0.00691539	-0.0794894	-0.0428584	-0.120379	-0.28891	-0.227658
		Sig. (2-tailed)	1e-06	.	1e-06	0.0464846	0.72015	0.121044	0.00364977	0.0732804	0.0587079	0.0905565	0.446553	0.968376	0.00728823	0.000373332	0.00151926	0.0651012	0.782404	0.944225	0.9612	0.739686	0.926951	0.252465	0.194986	0.266435	0.0152481	0.0786276	0.961193	0.57537	0.762895	0.395291	0.0377796	0.104557
		N	52	52	52	52	51	52	51	52	52	51	51	52	51	51	51	51	51	51	52	52	52	52	46	52	52	52	52	52	52	52	52	52
	U2AF65NormalTotal	Correlation Coefficient	0.919108	0.845983	1	0.273505	-0.0145999	0.245398	0.33187	0.170153	0.230384	0.168424	-0.123547	-0.0191905	0.492319	0.474118	0.476833	0.283982	-0.0474593	-0.0544796	0.0223272	0.039932	0.101442	0.110788	-0.13975	0.305882	0.31674	0.319656	0.0677351	0.0702329	0.0877625	-0.197757	-0.172608	-0.209784
		Sig. (2-tailed)	1e-06	1e-06	.	0.0395322	0.916549	0.065781	0.0173535	0.227825	0.0937416	0.237431	0.373438	0.891513	0.000242914	0.000440435	0.000403869	0.0434304	0.733265	0.704169	0.86906	0.768056	0.452746	0.411973	0.328034	0.0206697	0.016372	0.0153568	0.616628	0.603662	0.51623	0.14033	0.199158	0.117294
		N	57	52	57	57	54	57	51	52	54	51	54	53	51	51	51	51	54	51	57	57	57	57	51	57	57	57	57	57	57	57	57	57
	U2AF65TumorCytoplasm	Correlation Coefficient	0.164252	0.277396	0.273505	1	0.494167	0.934695	0.187687	0.0279616	0.074828	0.495588	0.535987	0.638753	0.179831	0.0619938	0.0342097	0.394905	0.586307	0.630843	0.237702	-0.0264357	0.227001	0.164836	0.038265	0.0464445	0.0311791	0.0576911	0.683077	0.55326	0.695868	0.538486	0.342181	0.473642
		Sig. (2-tailed)	0.222118	0.0464846	0.0395322	.	0.000146013	1e-06	0.18721	0.844007	0.590743	0.000217516	2.95424e-05	1e-06	0.206684	0.665622	0.811634	0.0041329	3.18569e-06	1e-06	0.0749999	0.845238	0.0894898	0.220457	0.789785	0.731549	0.817907	0.669916	1e-06	8.06709e-06	1e-06	1.55498e-05	0.0091783	0.000198176
		N	57	52	57	57	54	57	51	52	54	51	54	53	51	51	51	51	54	51	57	57	57	57	51	57	57	57	57	57	57	57	57	57
	U2AF65TumorNucleus	Correlation Coefficient	-0.0860367	-0.0514074	-0.0145999	0.494167	1	0.727138	0.0613205	-0.0365644	-0.0186988	0.197674	0.457741	0.463456	0.0946261	-0.0464295	-0.0186442	0.0916825	0.732301	0.716445	0.0679494	-0.0133657	0.132674	0.208	0.0780589	-0.0371302	-0.106014	-0.0758615	0.253459	0.583688	0.448328	0.311554	0.479587	0.447613
		Sig. (2-tailed)	0.536185	0.72015	0.916549	0.000146013	.	1e-06	0.669043	0.798929	0.895323	0.164395	0.000501057	0.000539927	0.508935	0.746296	0.89668	0.522262	1e-06	1e-06	0.625404	0.923581	0.338883	0.131228	0.597945	0.78981	0.445486	0.58561	0.0644171	3.61055e-06	0.000674277	0.0218319	0.000243185	0.000689436
		N	54	51	54	54	54	54	51	51	52	51	54	52	51	51	51	51	54	51	54	54	54	54	48	54	54	54	54	54	54	54	54	54
	U2AF65TumorTotal	Correlation Coefficient	0.120236	0.217707	0.245398	0.934695	0.727138	1	0.17141	0.0601895	0.117098	0.424499	0.577174	0.681261	0.197425	0.0758371	0.0624434	0.317647	0.686502	0.728507	0.21775	-0.00730781	0.228145	0.175639	0.0646168	0.01614	-0.0286501	0.00249554	0.600833	0.610187	0.68084	0.505704	0.426368	0.5108
		Sig. (2-tailed)	0.372989	0.121044	0.065781	1e-06	1e-06	.	0.229095	0.671663	0.399082	0.00190508	4.90629e-06	1e-06	0.164937	0.59686	0.663341	0.0231231	1e-06	1e-06	0.103706	0.956974	0.0878431	0.191263	0.652359	0.905147	0.832454	0.985301	1e-06	1e-06	1e-06	6.00386e-05	0.000942744	4.91063e-05
		N	57	52	57	57	54	57	51	52	54	51	54	53	51	51	51	51	54	51	57	57	57	57	51	57	57	57	57	57	57	57	57	57
	PSFNormalCytoplasm	Correlation Coefficient	0.243314	0.399837	0.33187	0.187687	0.0613205	0.17141	1	0.205982	0.275307	0.438275	0.0207268	0.111317	0.375229	0.123037	0.244853	0.134259	0.0665701	0.084755	0.171214	0.0328539	0.166248	0.191095	-0.222546	0.0683772	0.0886486	0.0874966	0.0281008	0.0250255	0.00959319	0.0992805	-0.00841667	0.0198203
		Sig. (2-tailed)	0.0853425	0.00364977	0.0173535	0.18721	0.669043	0.229095	.	0.147019	0.0505467	0.00129656	0.885212	0.436759	0.00666455	0.389704	0.083324	0.347579	0.642551	0.554298	0.229637	0.818971	0.243635	0.179183	0.141732	0.63353	0.536178	0.541509	0.844811	0.861619	0.946731	0.48822	0.953256	0.890201
		N	51	51	51	51	51	51	51	51	51	51	51	51	51	51	51	51	51	51	51	51	51	51	45	51	51	51	51	51	51	51	51	51
	PSFNormalNucleus	Correlation Coefficient	0.121745	0.250491	0.170153	0.0279616	-0.0365644	0.0601895	0.205982	1	0.994877	0.264627	0.208978	0.259626	-0.0291409	0.65448	0.507964	0.060362	-0.038646	-0.0081448	0.0163426	0.195199	-0.0963106	0.114518	-0.149589	0.199274	0.243709	0.226297	0.0837531	0.0133194	0.0476394	-0.100401	-0.170665	-0.158204
		Sig. (2-tailed)	0.389911	0.0732804	0.227825	0.844007	0.798929	0.671663	0.147019	.	1e-06	0.0605766	0.141099	0.0630708	0.839142	1e-06	0.000141735	0.673924	0.78774	0.954765	0.908452	0.165513	0.497008	0.418867	0.321082	0.156686	0.0816756	0.106704	0.554983	0.925334	0.737344	0.478823	0.226407	0.262645
		N	52	52	52	52	51	52	51	52	52	51	51	52	51	51	51	51	51	51	52	52	52	52	46	52	52	52	52	52	52	52	52	52
	PSFNormalTotal	Correlation Coefficient	0.15857	0.263895	0.230384	0.074828	-0.0186988	0.117098	0.275307	0.994877	1	0.284764	0.20321	0.262296	0.0189597	0.65276	0.52905	0.0843439	-0.016735	0.000271493	0.0676589	0.146517	-0.0317777	0.143084	-0.128751	0.171308	0.206335	0.193493	0.130156	0.0286662	0.0846214	-0.0369742	-0.158684	-0.120874
		Sig. (2-tailed)	0.252108	0.0587079	0.0937416	0.590743	0.895323	0.399082	0.0505467	1e-06	.	0.0428313	0.148493	0.0577776	0.894941	1e-06	6.57072e-05	0.556228	0.906264	0.998491	0.626887	0.29042	0.81956	0.301994	0.383134	0.215503	0.134411	0.160946	0.348212	0.836974	0.542935	0.790673	0.251762	0.383945
		N	54	52	54	54	52	54	51	52	54	51	52	53	51	51	51	51	52	51	54	54	54	54	48	54	54	54	54	54	54	54	54	54
	PSFTumorCytoplasm	Correlation Coefficient	0.0757048	0.239468	0.168424	0.495588	0.197674	0.424499	0.438275	0.264627	0.284764	1	0.347242	0.469478	0.128131	0.102177	0.0532151	0.443549	0.260307	0.319019	0.0568487	0.0359243	0.0011559	0.182998	0.132976	0.187868	0.333281	0.276201	0.326395	0.33144	0.362279	0.187294	0.0247975	0.0964771
		Sig. (2-tailed)	0.597502	0.0905565	0.237431	0.000217516	0.164395	0.00190508	0.00129656	0.0605766	0.0428313	.	0.012541	0.000509905	0.370224	0.475557	0.710732	0.00111415	0.0650634	0.0225041	0.69193	0.802377	0.993577	0.198669	0.383861	0.186777	0.0168547	0.0497714	0.0194102	0.017508	0.00898953	0.188152	0.862867	0.500644
		N	51	51	51	51	51	51	51	51	51	51	51	51	51	51	51	51	51	51	51	51	51	51	45	51	51	51	51	51	51	51	51	51
	PSFTumorNucleus	Correlation Coefficient	-0.147867	-0.108969	-0.123547	0.535987	0.457741	0.577174	0.0207268	0.208978	0.20321	0.347242	1	0.963115	0.00660708	-0.0239841	-0.0774731	0.000995565	0.715832	0.737442	-0.0146384	0.0550632	-0.0595426	0.0663829	-0.0881694	-0.0563053	-0.0794816	-0.0508539	0.469981	0.373292	0.463958	0.446117	0.218923	0.382274
		Sig. (2-tailed)	0.285949	0.446553	0.373438	2.95424e-05	0.000501057	4.90629e-06	0.885212	0.141099	0.148493	0.012541	.	1e-06	0.963299	0.867324	0.588945	0.994468	1e-06	1e-06	0.91633	0.692501	0.668878	0.633415	0.551231	0.685921	0.567792	0.714969	0.000336182	0.00543237	0.00040989	0.000722099	0.11173	0.00433613
		N	54	51	54	54	54	54	51	51	52	51	54	52	51	51	51	51	54	51	54	54	54	54	48	54	54	54	54	54	54	54	54	54
	PSFTumorTotal	Correlation Coefficient	-0.0580552	-0.00563476	-0.0191905	0.638753	0.463456	0.681261	0.111317	0.259626	0.262296	0.469478	0.963115	1	0.0749791	0.0133032	-0.0367421	0.10914	0.734375	0.735928	0.0566808	0.0550106	-0.0497274	0.0882001	-0.0535177	-0.0649518	-0.0520491	-0.0533806	0.48089	0.464631	0.520803	0.476214	0.289631	0.416353
		Sig. (2-tailed)	0.679666	0.968376	0.891513	1e-06	0.000539927	1e-06	0.436759	0.0630708	0.0577776	0.000509905	1e-06	.	0.60103	0.92618	0.797972	0.445835	1e-06	1e-06	0.686855	0.695627	0.723633	0.52999	0.720886	0.644032	0.711279	0.704227	0.000267559	0.000456755	6.39e-05	0.000312904	0.0354148	0.00192908
		N	53	52	53	53	52	53	51	52	53	51	52	53	51	51	51	51	52	51	53	53	53	53	47	53	53	53	53	53	53	53	53	53
	p54nrbNormalCytoplasm	Correlation Coefficient	0.461277	0.371411	0.492319	0.179831	0.0946261	0.197425	0.375229	-0.0291409	0.0189597	0.128131	0.00660708	0.0749791	1	0.136247	0.345211	0.364035	0.118113	0.184077	0.181015	0.325307	-0.0427169	0.100404	-0.117467	-0.0131231	0.0510883	0.0295948	-0.0656123	0.066454	0.0171497	-0.0201362	-0.0642548	-0.0428074
		Sig. (2-tailed)	0.000657284	0.00728823	0.000242914	0.206684	0.508935	0.164937	0.00666455	0.839142	0.894941	0.370224	0.963299	0.60103	.	0.34042	0.0131023	0.0086379	0.4091	0.19599	0.203662	0.0198423	0.765983	0.483288	0.442198	0.927176	0.721817	0.83667	0.647353	0.643132	0.904922	0.888462	0.654183	0.765502
		N	51	51	51	51	51	51	51	51	51	51	51	51	51	51	51	51	51	51	51	51	51	51	45	51	51	51	51	51	51	51	51	51
	p54nrbNormalNucleus	Correlation Coefficient	0.456471	0.479276	0.474118	0.0619938	-0.0464295	0.0758371	0.123037	0.65448	0.65276	0.102177	-0.0239841	0.0133032	0.136247	1	0.88371	0.175113	-0.030591	0.0224434	0.00300571	-0.00153516	-0.0743258	0.119834	-0.0313733	0.282049	0.225661	0.281551	0.00624434	-0.12847	-0.0628054	-0.31629	-0.350136	-0.369284
		Sig. (2-tailed)	0.000760533	0.000373332	0.000440435	0.665622	0.746296	0.59686	0.389704	1e-06	1e-06	0.475557	0.867324	0.92618	0.34042	.	1e-06	0.219042	0.831251	0.875777	0.983299	0.99147	0.604213	0.402259	0.837895	0.0449404	0.111339	0.0453361	0.965312	0.368947	0.661507	0.0237496	0.0117766	0.00765717
		N	51	51	51	51	51	51	51	51	51	51	51	51	51	51	51	51	51	51	51	51	51	51	45	51	51	51	51	51	51	51	51	51
	p54nrbNormalTotal	Correlation Coefficient	0.485339	0.43267	0.476833	0.0342097	-0.0186442	0.0624434	0.244853	0.507964	0.52905	0.0532151	-0.0774731	-0.0367421	0.345211	0.88371	1	0.159457	-0.0169246	0.038009	-0.018893	0.0151981	-0.142671	0.0874463	-0.0682187	0.185619	0.11593	0.180687	-0.0284163	-0.0765663	-0.0484163	-0.250679	-0.239005	-0.2634
		Sig. (2-tailed)	0.000306376	0.00151926	0.000403869	0.811634	0.89668	0.663341	0.083324	0.000141735	6.57072e-05	0.710732	0.588945	0.797972	0.0131023	1e-06	.	0.2637	0.906164	0.791159	0.895309	0.9157	0.317921	0.541742	0.656127	0.192203	0.417872	0.204496	0.843091	0.593326	0.735825	0.076018	0.0912009	0.0618256
		N	51	51	51	51	51	51	51	51	51	51	51	51	51	51	51	51	51	51	51	51	51	51	45	51	51	51	51	51	51	51	51	51
	p54nrbTumorCytoplasm	Correlation Coefficient	0.266425	0.260271	0.283982	0.394905	0.0916825	0.317647	0.134259	0.060362	0.0843439	0.443549	0.000995565	0.10914	0.364035	0.175113	0.159457	1	0.123088	0.258552	0.0891217	0.0526559	-0.0446256	0.161938	0.0339269	0.0383275	0.172855	0.0942577	0.0878733	0.0885128	0.131584	-0.0132127	-0.0708597	-0.0366072
		Sig. (2-tailed)	0.0587843	0.0651012	0.0434304	0.0041329	0.522262	0.0231231	0.347579	0.673924	0.556228	0.00111415	0.994468	0.445835	0.0086379	0.219042	0.2637	.	0.389507	0.0669599	0.533996	0.713641	0.755843	0.256246	0.824899	0.789449	0.225137	0.510594	0.539763	0.536805	0.357358	0.926681	0.621224	0.798699
		N	51	51	51	51	51	51	51	51	51	51	51	51	51	51	51	51	51	51	51	51	51	51	45	51	51	51	51	51	51	51	51	51
	p54nrbTumorNucleus	Correlation Coefficient	-0.0736096	-0.0396416	-0.0474593	0.586307	0.732301	0.686502	0.0665701	-0.038646	-0.016735	0.260307	0.715832	0.734375	0.118113	-0.030591	-0.0169246	0.123088	1	0.983075	0.0523836	-0.0628491	0.026149	0.205049	-0.0252762	-0.172842	-0.168798	-0.178675	0.307208	0.444847	0.39923	0.452827	0.384211	0.481197
		Sig. (2-tailed)	0.59682	0.782404	0.733265	3.18569e-06	1e-06	1e-06	0.642551	0.78774	0.906264	0.0650634	1e-06	1e-06	0.4091	0.831251	0.906164	0.389507	.	1e-06	0.706775	0.65164	0.851119	0.13691	0.864593	0.211358	0.222403	0.196116	0.0238438	0.000750947	0.00278511	0.000585698	0.00412706	0.000230121
		N	54	51	54	54	54	54	51	51	52	51	54	52	51	51	51	51	54	51	54	54	54	54	48	54	54	54	54	54	54	54	54	54
	p54nrbTumorTotal	Correlation Coefficient	-0.0823529	0.0100452	-0.0544796	0.630843	0.716445	0.728507	0.084755	-0.0081448	0.000271493	0.319019	0.737442	0.735928	0.184077	0.0224434	0.038009	0.258552	0.983075	1	0.066889	-0.0426774	-0.0171366	0.223474	-0.011309	-0.16417	-0.124709	-0.155889	0.323077	0.401158	0.387059	0.456833	0.330407	0.449739
		Sig. (2-tailed)	0.565619	0.944225	0.704169	1e-06	1e-06	1e-06	0.554298	0.954765	0.998491	0.0225041	1e-06	1e-06	0.19599	0.875777	0.791159	0.0669599	1e-06	.	0.640955	0.766194	0.904994	0.114941	0.941225	0.24966	0.383246	0.274671	0.0207542	0.00352911	0.00501755	0.000752278	0.017884	0.000929656
		N	51	51	51	51	51	51	51	51	51	51	51	51	51	51	51	51	51	51	51	51	51	51	45	51	51	51	51	51	51	51	51	51
	UICC	Correlation Coefficient	0.00805975	0.00691416	0.0223272	0.237702	0.0679494	0.21775	0.171214	0.0163426	0.0676589	0.0568487	-0.0146384	0.0566808	0.181015	0.00300571	-0.018893	0.0891217	0.0523836	0.066889	1	0.520926	0.688653	0.602786	0.107256	-0.0404554	-0.0492082	-0.0447474	0.204078	0.180061	0.195287	0.271126	0.191258	0.251999
		Sig. (2-tailed)	0.952552	0.9612	0.86906	0.0749999	0.625404	0.103706	0.229637	0.908452	0.626887	0.69193	0.91633	0.686855	0.203662	0.983299	0.895309	0.533996	0.706775	0.640955	.	1.0195e-05	1e-06	1e-06	0.427124	0.750945	0.699392	0.725514	0.105766	0.154514	0.121999	0.0316074	0.133209	0.0463264
		N	57	52	57	57	54	57	51	52	54	51	54	53	51	51	51	51	54	51	64	64	64	64	57	64	64	64	64	64	64	63	63	63
	pT	Correlation Coefficient	0.0202829	0.047199	0.039932	-0.0264357	-0.0133657	-0.00730781	0.0328539	0.195199	0.146517	0.0359243	0.0550632	0.0550106	0.325307	-0.00153516	0.0151981	0.0526559	-0.0628491	-0.0426774	0.520926	1	0.265759	0.290462	0.0306621	-0.0824072	-0.0268351	-0.0724037	-0.0284931	0.103869	0.048988	0.0514085	0.0553568	0.0767923
		Sig. (2-tailed)	0.880958	0.739686	0.768056	0.845238	0.923581	0.956974	0.818971	0.165513	0.29042	0.802377	0.692501	0.695627	0.0198423	0.99147	0.9157	0.713641	0.65164	0.766194	1.0195e-05	.	0.0337962	0.0198939	0.820876	0.517394	0.833287	0.569655	0.823148	0.414052	0.700674	0.689056	0.666531	0.549707
		N	57	52	57	57	54	57	51	52	54	51	54	53	51	51	51	51	54	51	64	64	64	64	57	64	64	64	64	64	64	63	63	63
	pN	Correlation Coefficient	0.0687249	-0.0130303	0.101442	0.227001	0.132674	0.228145	0.166248	-0.0963106	-0.0317777	0.0011559	-0.0595426	-0.0497274	-0.0427169	-0.0743258	-0.142671	-0.0446256	0.026149	-0.0171366	0.688653	0.265759	1	0.384548	0.168161	0.0188444	-0.152851	-0.0673515	0.244277	0.204151	0.233107	0.268353	0.33018	0.316452
		Sig. (2-tailed)	0.611476	0.926951	0.452746	0.0894898	0.338883	0.0878431	0.243635	0.497008	0.81956	0.993577	0.668878	0.723633	0.765983	0.604213	0.317921	0.755843	0.851119	0.904994	1e-06	0.0337962	.	0.00170488	0.211158	0.882503	0.227891	0.596949	0.0517411	0.10564	0.0637774	0.0334614	0.00822228	0.0115118
		N	57	52	57	57	54	57	51	52	54	51	54	53	51	51	51	51	54	51	64	64	64	64	57	64	64	64	64	64	64	63	63	63
	M	Correlation Coefficient	0.0378299	0.16158	0.110788	0.164836	0.208	0.175639	0.191095	0.114518	0.143084	0.182998	0.0663829	0.0882001	0.100404	0.119834	0.0874463	0.161938	0.205049	0.223474	0.602786	0.290462	0.384548	1	-0.0147831	-0.0147169	0.0452023	0.00840963	0.112478	0.177655	0.156626	0.189815	0.105693	0.155307
		Sig. (2-tailed)	0.779952	0.252465	0.411973	0.220457	0.131228	0.191263	0.179183	0.418867	0.301994	0.198669	0.633415	0.52999	0.483288	0.402259	0.541742	0.256246	0.13691	0.114941	1e-06	0.0198939	0.00170488	.	0.913089	0.908112	0.722835	0.947416	0.376212	0.16019	0.216475	0.136218	0.4097	0.224207
		N	57	52	57	57	54	57	51	52	54	51	54	53	51	51	51	51	54	51	64	64	64	64	57	64	64	64	64	64	64	63	63	63
	G	Correlation Coefficient	-0.111812	-0.194603	-0.13975	0.038265	0.0780589	0.0646168	-0.222546	-0.149589	-0.128751	0.132976	-0.0881694	-0.0535177	-0.117467	-0.0313733	-0.0682187	0.0339269	-0.0252762	-0.011309	0.107256	0.0306621	0.168161	-0.0147831	1	-0.0208811	0.0791297	0.0104406	0.21568	0.160821	0.205694	0.109532	0.0444174	0.0975383
		Sig. (2-tailed)	0.434709	0.194986	0.328034	0.789785	0.597945	0.652359	0.141732	0.321082	0.383134	0.383861	0.551231	0.720886	0.442198	0.837895	0.656127	0.824899	0.864593	0.941225	0.427124	0.820876	0.211158	0.913089	.	0.877473	0.558481	0.93856	0.107115	0.232059	0.12478	0.417322	0.742854	0.470413
		N	51	46	51	51	48	51	45	46	48	45	48	47	45	45	45	45	48	45	57	57	57	57	57	57	57	57	57	57	57	57	57	57
	EMSAcytoplasmNormalTissue	Correlation Coefficient	0.390115	0.156969	0.305882	0.0464445	-0.0371302	0.01614	0.0683772	0.199274	0.171308	0.187868	-0.0563053	-0.0649518	-0.0131231	0.282049	0.185619	0.0383275	-0.172842	-0.16417	-0.0404554	-0.0824072	0.0188444	-0.0147169	-0.0208811	1	0.793109	0.956156	0.401479	0.206903	0.346574	-0.426326	-0.337494	-0.454983
		Sig. (2-tailed)	0.00270071	0.266435	0.0206697	0.731549	0.78981	0.905147	0.63353	0.156686	0.215503	0.186777	0.685921	0.644032	0.927176	0.0449404	0.192203	0.789449	0.211358	0.24966	0.750945	0.517394	0.882503	0.908112	0.877473	.	1e-06	1e-06	0.00100887	0.100921	0.00502443	0.000494079	0.00683059	0.000179408
		N	57	52	57	57	54	57	51	52	54	51	54	53	51	51	51	51	54	51	64	64	64	64	57	64	64	64	64	64	64	63	63	63
	EMSAnucleusNormalTissue	Correlation Coefficient	0.301086	0.334849	0.31674	0.0311791	-0.106014	-0.0286501	0.0886486	0.243709	0.206335	0.333281	-0.0794816	-0.0520491	0.0510883	0.225661	0.11593	0.172855	-0.168798	-0.124709	-0.0492082	-0.0268351	-0.152851	0.0452023	0.0791297	0.793109	1	0.927903	0.298961	0.106784	0.23096	-0.329865	-0.557096	-0.522233
		Sig. (2-tailed)	0.0228533	0.0152481	0.016372	0.817907	0.445486	0.832454	0.536178	0.0816756	0.134411	0.0168547	0.567792	0.711279	0.721817	0.111339	0.417872	0.225137	0.222403	0.383246	0.699392	0.833287	0.227891	0.722835	0.558481	1e-06	.	1e-06	0.0164081	0.400999	0.0663313	0.00828732	2.11565e-06	1.13398e-05
		N	57	52	57	57	54	57	51	52	54	51	54	53	51	51	51	51	54	51	64	64	64	64	57	64	64	64	64	64	64	63	63	63
	EMSAtotalNormalTissue	Correlation Coefficient	0.356863	0.246105	0.319656	0.0576911	-0.0758615	0.00249554	0.0874966	0.226297	0.193493	0.276201	-0.0508539	-0.0533806	0.0295948	0.281551	0.180687	0.0942577	-0.178675	-0.155889	-0.0447474	-0.0724037	-0.0673515	0.00840963	0.0104406	0.956156	0.927903	1	0.3844	0.175445	0.318368	-0.398315	-0.45844	-0.510057
		Sig. (2-tailed)	0.00643175	0.0786276	0.0153568	0.669916	0.58561	0.985301	0.541509	0.106704	0.160946	0.0497714	0.714969	0.704227	0.83667	0.0453361	0.204496	0.510594	0.196116	0.274671	0.725514	0.569655	0.596949	0.947416	0.93856	1e-06	1e-06	.	0.00171253	0.16554	0.0103523	0.00122439	0.000157795	1.9534e-05
		N	57	52	57	57	54	57	51	52	54	51	54	53	51	51	51	51	54	51	64	64	64	64	57	64	64	64	64	64	64	63	63	63
	EMSAcytoplasmTumor	Correlation Coefficient	0.0771013	0.00691539	0.0677351	0.683077	0.253459	0.600833	0.0281008	0.0837531	0.130156	0.326395	0.469981	0.48089	-0.0656123	0.00624434	-0.0284163	0.0878733	0.307208	0.323077	0.204078	-0.0284931	0.244277	0.112478	0.21568	0.401479	0.298961	0.3844	1	0.644649	0.913564	0.602662	0.31764	0.473615
		Sig. (2-tailed)	0.56864	0.961193	0.616628	1e-06	0.0644171	1e-06	0.844811	0.554983	0.348212	0.0194102	0.000336182	0.000267559	0.647353	0.965312	0.843091	0.539763	0.0238438	0.0207542	0.105766	0.823148	0.0517411	0.376212	0.107115	0.00100887	0.0164081	0.00171253	.	1e-06	1e-06	1e-06	0.011188	8.83585e-05
		N	57	52	57	57	54	57	51	52	54	51	54	53	51	51	51	51	54	51	64	64	64	64	57	64	64	64	64	64	64	63	63	63
	EMSAnucleusTumor	Correlation Coefficient	0.0610284	-0.0794894	0.0702329	0.55326	0.583688	0.610187	0.0250255	0.0133194	0.0286662	0.33144	0.373292	0.464631	0.066454	-0.12847	-0.0765663	0.0885128	0.444847	0.401158	0.180061	0.103869	0.204151	0.177655	0.160821	0.206903	0.106784	0.175445	0.644649	1	0.885493	0.497066	0.695422	0.633163
		Sig. (2-tailed)	0.652013	0.57537	0.603662	8.06709e-06	3.61055e-06	1e-06	0.861619	0.925334	0.836974	0.017508	0.00543237	0.000456755	0.643132	0.368947	0.593326	0.536805	0.000750947	0.00352911	0.154514	0.414052	0.10564	0.16019	0.232059	0.100921	0.400999	0.16554	1e-06	.	1e-06	3.41224e-05	1e-06	1e-06
		N	57	52	57	57	54	57	51	52	54	51	54	53	51	51	51	51	54	51	64	64	64	64	57	64	64	64	64	64	64	63	63	63
	EMSAtotalTumor	Correlation Coefficient	0.0938553	-0.0428584	0.0877625	0.695868	0.448328	0.68084	0.00959319	0.0476394	0.0846214	0.362279	0.463958	0.520803	0.0171497	-0.0628054	-0.0484163	0.131584	0.39923	0.387059	0.195287	0.048988	0.233107	0.156626	0.205694	0.346574	0.23096	0.318368	0.913564	0.885493	1	0.591014	0.527506	0.587692
		Sig. (2-tailed)	0.487413	0.762895	0.51623	1e-06	0.000674277	1e-06	0.946731	0.737344	0.542935	0.00898953	0.00040989	6.39e-05	0.904922	0.661507	0.735825	0.357358	0.00278511	0.00501755	0.121999	0.700674	0.0637774	0.216475	0.12478	0.00502443	0.0663313	0.0103523	1e-06	1e-06	.	1e-06	8.9015e-06	1e-06
		N	57	52	57	57	54	57	51	52	54	51	54	53	51	51	51	51	54	51	64	64	64	64	57	64	64	64	64	64	64	63	63	63
	EMSAratioTumorNormalInCytoplasm	Correlation Coefficient	-0.239176	-0.120379	-0.197757	0.538486	0.311554	0.505704	0.0992805	-0.100401	-0.0369742	0.187294	0.446117	0.476214	-0.0201362	-0.31629	-0.250679	-0.0132127	0.452827	0.456833	0.271126	0.0514085	0.268353	0.189815	0.109532	-0.426326	-0.329865	-0.398315	0.602662	0.497066	0.591014	1	0.65001	0.894439
		Sig. (2-tailed)	0.0731593	0.395291	0.14033	1.55498e-05	0.0218319	6.00386e-05	0.48822	0.478823	0.790673	0.188152	0.000722099	0.000312904	0.888462	0.0237496	0.076018	0.926681	0.000585698	0.000752278	0.0316074	0.689056	0.0334614	0.136218	0.417322	0.000494079	0.00828732	0.00122439	1e-06	3.41224e-05	1e-06	.	1e-06	1e-06
		N	57	52	57	57	54	57	51	52	54	51	54	53	51	51	51	51	54	51	63	63	63	63	57	63	63	63	63	63	63	63	63	63
	EMSAratioTumorNormalInNucleus	Correlation Coefficient	-0.151024	-0.28891	-0.172608	0.342181	0.479587	0.426368	-0.00841667	-0.170665	-0.158684	0.0247975	0.218923	0.289631	-0.0642548	-0.350136	-0.239005	-0.0708597	0.384211	0.330407	0.191258	0.0553568	0.33018	0.105693	0.0444174	-0.337494	-0.557096	-0.45844	0.31764	0.695422	0.527506	0.65001	1	0.90668
		Sig. (2-tailed)	0.262121	0.0377796	0.199158	0.0091783	0.000243185	0.000942744	0.953256	0.226407	0.251762	0.862867	0.11173	0.0354148	0.654183	0.0117766	0.0912009	0.621224	0.00412706	0.017884	0.133209	0.666531	0.00822228	0.4097	0.742854	0.00683059	2.11565e-06	0.000157795	0.011188	1e-06	8.9015e-06	1e-06	.	1e-06
		N	57	52	57	57	54	57	51	52	54	51	54	53	51	51	51	51	54	51	63	63	63	63	57	63	63	63	63	63	63	63	63	63
	EMSAratioTumorNormalTotal	Correlation Coefficient	-0.213317	-0.227658	-0.209784	0.473642	0.447613	0.5108	0.0198203	-0.158204	-0.120874	0.0964771	0.382274	0.416353	-0.0428074	-0.369284	-0.2634	-0.0366072	0.481197	0.449739	0.251999	0.0767923	0.316452	0.155307	0.0975383	-0.454983	-0.522233	-0.510057	0.473615	0.633163	0.587692	0.894439	0.90668	1
		Sig. (2-tailed)	0.11111	0.104557	0.117294	0.000198176	0.000689436	4.91063e-05	0.890201	0.262645	0.383945	0.500644	0.00433613	0.00192908	0.765502	0.00765717	0.0618256	0.798699	0.000230121	0.000929656	0.0463264	0.549707	0.0115118	0.224207	0.470413	0.000179408	1.13398e-05	1.9534e-05	8.83585e-05	1e-06	1e-06	1e-06	1e-06	.
		N	57	52	57	57	54	57	51	52	54	51	54	53	51	51	51	51	54	51	63	63	63	63	57	63	63	63	63	63	63	63	63	63
**. Correlation is significant at the 0.01 level (2-tailed).
*. Correlation is significant at the 0.05 level (2-tailed).
