# Supplementary material for: Triplex DNA-binding proteins are associated with clinical outcomes revealed by proteomic measurements in patients with colorectal cancer
Source: Mol Cancer. 2012 Jun 8;11:38. doi: 10.1186/1476-4598-11-38 (PMC3537547; doi:10.1186/1476-4598-11-38)
Supplement: Additional file 5 — Daniel Apr 5(1). [file 1476-4598-11-38-S5.xls]

## Sheet: Sheet
Frequencies
Notes
Output Created		2010-04-05 21:25:15
Comments
Input	Data	d:\eigene dateien\Labor neu\Triplexprojekt\UICC34.sav
	Filter	<none>
	Weight	<none>
	Split File	<none>
	N of Rows in Working Data File	32
Missing Value Handling	Definition of Missing	User-defined missing values are treated as missing.
	Cases Used	Statistics are based on all cases with valid data.
Syntax		FREQUENCIES VARIABLES=EMSAcytoplasmNormalTissue EMSAnucleusNormalTissue EMSAtotalNormalTissue EMSAcytoplasmTumor EMSAnucleusTumor EMSAtotalTumor EMSAratioTumorNormalInCytoplasm EMSAratioTumorNormalInNucleus EMSAratioTumorNormalTotal p54nrbNormalCytoplasm p54nrbNormalNucleus p54nrbNormalTotal p54nrbTumorCytoplasm p54nrbTumorNucleus p54nrbTumorTotal PSFNormalCytoplasm PSFNormalNucleus PSFNormalTota…
Resources	Elapsed Time	1899-12-31 00:00:00
	Total Values Allowed	149796
Statistics
This table contains UICC 3 + 4 patients only!		EMSAcytoplasmNormalTissue	EMSAnucleusNormalTissue	EMSAtotalNormalTissue	EMSAcytoplasmTumor	EMSAnucleusTumor	EMSAtotalTumor	EMSAratioTumorNormalInCytoplasm	EMSAratioTumorNormalInNucleus	EMSAratioTumorNormalTotal	p54nrbNormalCytoplasm	p54nrbNormalNucleus	p54nrbNormalTotal	p54nrbTumorCytoplasm	p54nrbTumorNucleus	p54nrbTumorTotal	PSFNormalCytoplasm	PSFNormalNucleus	PSFNormalTotal	PSFTumorCytoplasm	PSFTumorNucleus	PSFTumorTotal	U2AF65NormalCytoplasm	U2AF65NormalNucleus	U2AF65NormalTotal	U2AF65TumorCytoplasm	U2AF65TumorNucleus	U2AF65TumorTotal
N	Valid	31	31	31	31	31	31	30	30	30	25	25	25	25	26	25	25	26	26	25	26	26	27	26	27	27	26	27
	Missing	1	1	1	1	1	1	2	2	2	7	7	7	7	6	7	7	6	6	7	6	6	5	6	5	5	6	5
Mean		0.396903	0.260548	0.657452	0.589129	0.418065	1.00739	37.1359	3.2493	2.81043	0.070084	0.47616	0.546252	0.10968	0.929192	1.05381	0.034356	0.382808	0.415846	0.100668	0.737623	0.815265	0.294822	0.223727	0.51027	0.4907	0.32065	0.799463
Median		0.409	0.214	0.586	0.551	0.451	1.069	1.5395	1.914	1.782	0.0558	0.4256	0.5083	0.0693	0.96245	1.0261	0.0221	0.2956	0.3171	0.0247	0.635	0.74965	0.2086	0.0918	0.2838	0.4153	0.16545	0.7086
Frequencies
Notes
Output Created		2010-04-05 21:29:09
Comments
Input	Data	d:\eigene dateien\Labor neu\Triplexprojekt\UICC12.sav
	Filter	<none>
	Weight	<none>
	Split File	<none>
	N of Rows in Working Data File	34
Missing Value Handling	Definition of Missing	User-defined missing values are treated as missing.
	Cases Used	Statistics are based on all cases with valid data.
Syntax		FREQUENCIES VARIABLES=EMSAcytoplasmNormalTissue EMSAnucleusNormalTissue EMSAtotalNormalTissue EMSAcytoplasmTumor EMSAnucleusTumor EMSAtotalTumor EMSAratioTumorNormalInCytoplasm EMSAratioTumorNormalInNucleus EMSAratioTumorNormalTotal p54nrbNormalCytoplasm p54nrbNormalNucleus p54nrbNormalTotal p54nrbTumorCytoplasm p54nrbTumorNucleus p54nrbTumorTotal PSFNormalCytoplasm PSFNormalNucleus PSFNormalTota…
Resources	Elapsed Time	1899-12-31 00:00:00
	Total Values Allowed	149796
Statistics
This table contains UICC 1 + 2 patients only!		EMSAcytoplasmNormalTissue	EMSAnucleusNormalTissue	EMSAtotalNormalTissue	EMSAcytoplasmTumor	EMSAnucleusTumor	EMSAtotalTumor	EMSAratioTumorNormalInCytoplasm	EMSAratioTumorNormalInNucleus	EMSAratioTumorNormalTotal	p54nrbNormalCytoplasm	p54nrbNormalNucleus	p54nrbNormalTotal	p54nrbTumorCytoplasm	p54nrbTumorNucleus	p54nrbTumorTotal	PSFNormalCytoplasm	PSFNormalNucleus	PSFNormalTotal	PSFTumorCytoplasm	PSFTumorNucleus	PSFTumorTotal	U2AF65NormalCytoplasm	U2AF65NormalNucleus	U2AF65NormalTotal	U2AF65TumorCytoplasm	U2AF65TumorNucleus	U2AF65TumorTotal
N	Valid	33	33	33	33	33	33	33	33	33	26	26	26	26	28	26	26	26	28	26	28	27	30	26	30	30	28	30
	Missing	1	1	1	1	1	1	1	1	1	8	8	8	8	6	8	8	8	6	8	6	7	4	8	4	4	6	4
Mean		0.375848	0.267273	0.643121	0.439303	0.306515	0.745727	1.22036	5.48873	1.33461	0.103865	0.488196	0.592054	0.0713423	0.842268	0.956835	0.0297654	0.444608	0.4405	0.0482308	0.963868	0.980756	0.256807	0.219169	0.44676	0.34913	0.365729	0.690463
Median		0.358	0.23	0.61	0.416	0.32	0.683	0.909	1.132	1.015	0.05595	0.45455	0.4986	0.0456	0.5199	0.7509	0.01535	0.34685	0.3337	0.02685	0.72245	0.7212	0.16055	0.08845	0.2772	0.15885	0.06975	0.2349
NPar Tests
Notes
Output Created		2010-04-05 21:30:00
Comments
Input	Data	d:\eigene dateien\Labor neu\Triplexprojekt\Triplexdata.sav
	Filter	<none>
	Weight	<none>
	Split File	<none>
	N of Rows in Working Data File	65
Missing Value Handling	Definition of Missing	User-defined missing values are treated as missing.
	Cases Used	Statistics for each test are based on all cases with valid data for the variable(s) used in that test.
Syntax		NPAR TESTS /M-W= p54nrbNormalCytoplasm p54nrbNormalNucleus p54nrbNormalTotal p54nrbTumorCytoplasm p54nrbTumorNucleus p54nrbTumorTotal PSFNormalCytoplasm PSFNormalNucleus PSFNormalTotal PSFTumorCytoplasm PSFTumorNucleus PSFTumorTotal U2AF65NormalCytoplasm U2AF65NormalNucleus U2AF65NormalTotal U2AF65TumorCytoplasm U2AF65TumorNucleus U2AF65TumorTotal BY UICCdicho(1 2) /MISSING ANALYSIS.
Resources	Elapsed Time	1899-12-31 00:00:00
	Number of Cases Allowed(a)	21845
a. Based on availability of workspace memory.
Mann-Whitney Test
Ranks
	UICCdicho	N	Mean Rank	Sum of Ranks
p54nrbNormalCytoplasm	1	26	25.3462	659
	2	25	26.68	667
	Total	51
p54nrbNormalNucleus	1	26	26.6538	693
	2	25	25.32	633
	Total	51
p54nrbNormalTotal	1	26	27.4231	713
	2	25	24.52	613
	Total	51
p54nrbTumorCytoplasm	1	26	24.2308	630
	2	25	27.84	696
	Total	51
p54nrbTumorNucleus	1	28	25.7857	722
	2	26	29.3462	763
	Total	54
p54nrbTumorTotal	1	26	24.3846	634
	2	25	27.68	692
	Total	51
PSFNormalCytoplasm	1	26	24.4808	636.5
	2	25	27.58	689.5
	Total	51
PSFNormalNucleus	1	26	28	728
	2	26	25	650
	Total	52
PSFNormalTotal	1	28	27.8929	781
	2	26	27.0769	704
	Total	54
PSFTumorCytoplasm	1	26	25.0385	651
	2	25	27	675
	Total	51
PSFTumorNucleus	1	28	28.1429	788
	2	26	26.8077	697
	Total	54
PSFTumorTotal	1	27	26.9259	727
	2	26	27.0769	704
	Total	53
U2AF65NormalCytoplasm	1	30	28.8667	866
	2	27	29.1481	787
	Total	57
U2AF65NormalNucleus	1	26	27.0769	704
	2	26	25.9231	674
	Total	52
U2AF65NormalTotal	1	30	28.6	858
	2	27	29.4444	795
	Total	57
U2AF65TumorCytoplasm	1	30	24.2833	728.5
	2	27	34.2407	924.5
	Total	57
U2AF65TumorNucleus	1	28	24.5357	687
	2	26	30.6923	798
	Total	54
U2AF65TumorTotal	1	30	24.3667	731
	2	27	34.1481	922
	Total	57
Test Statistics(a)
This is the statistic results file! It shows the p-value of the difference between the median of patients with UICC 1/2 as compared to patients with UICC 3/4	p54nrbNormalCytoplasm	p54nrbNormalNucleus	p54nrbNormalTotal	p54nrbTumorCytoplasm	p54nrbTumorNucleus	p54nrbTumorTotal	PSFNormalCytoplasm	PSFNormalNucleus	PSFNormalTotal	PSFTumorCytoplasm	PSFTumorNucleus	PSFTumorTotal	U2AF65NormalCytoplasm	U2AF65NormalNucleus	U2AF65NormalTotal	U2AF65TumorCytoplasm	U2AF65TumorNucleus	U2AF65TumorTotal
Mann-Whitney U	308	308	288	279	316	283	285.5	299	353	300	346	349	401	323	393	263.5	281	266
Wilcoxon W	659	633	613	630	722	634	636.5	650	704	651	697	727	866	674	858	728.5	687	731
Z	-0.320325	-0.320318	-0.697162	-0.866743	-0.831032	-0.791374	-0.744302	-0.713746	-0.190434	-0.471077	-0.311637	-0.035584	-0.0639284	-0.274518	-0.191785	-2.26154	-1.43699	-2.22151
Significance (=p-value)	0.748722	0.748727	0.485701	0.386083	0.405955	0.428726	0.456694	0.475384	0.848969	0.637586	0.755316	0.971614	0.949027	0.783687	0.84791	0.0237257	0.15072	0.0263162	<-- You should not use this last value (total value in red) as it reflects only the good significance of the cytoplasmatic results while nuclear results were quite contradictory
a. Grouping Variable: UICCdicho
